# Supplementary material
Source: PubMed Central journal article supplement (PMC4230322)
Supplement: bi501120p_si_001.pdf [file bi501120p_si_001.pdf]

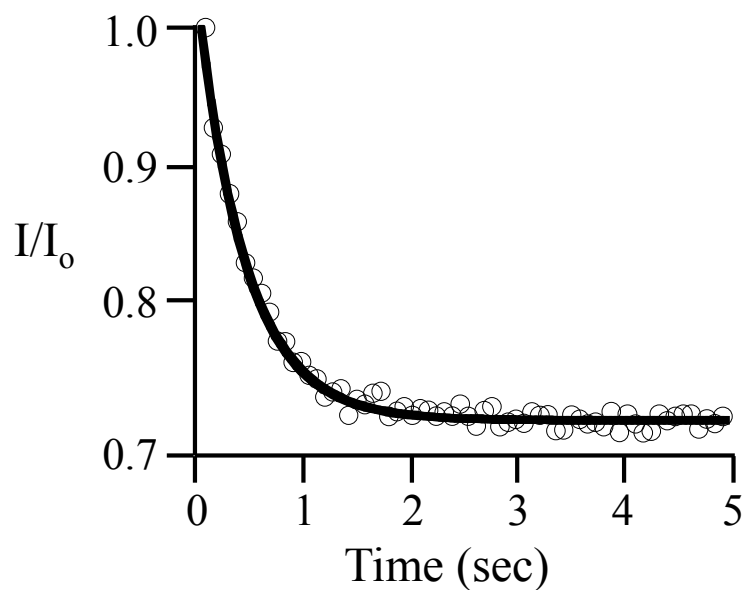

**Figure S1. Presteady-state binding of PAPS to SULT1A1.** Reactions were initiated by rapidly mixing 1:1 (v/v) a solution containing SULT1A1 (30 nM, dimer),  $\text{MgCl}_2$  (5.0 mM) and  $\text{NaPO}_4$  (25 mM), pH 7.2, with an identical solution that lacked enzyme and contained PAPS (2.0  $\mu\text{M}$ ). Binding was monitored *via* nucleotide-induced change in SULT1A1 intrinsic fluorescence ( $\lambda_{\text{ex}} = 290 \text{ nm}$ ,  $\lambda_{\text{em}} \geq 330 \text{ nm}$ ). Fluorescence intensity is plotted relative to the protein fluorescence intensity at  $t = 0$  ( $I/I_0$ ). Solutions were equilibrated at  $25 \pm 2 \text{ }^\circ\text{C}$  prior to mixing. The solid curve represents the best-fit behavior predicted by a single-exponential model.

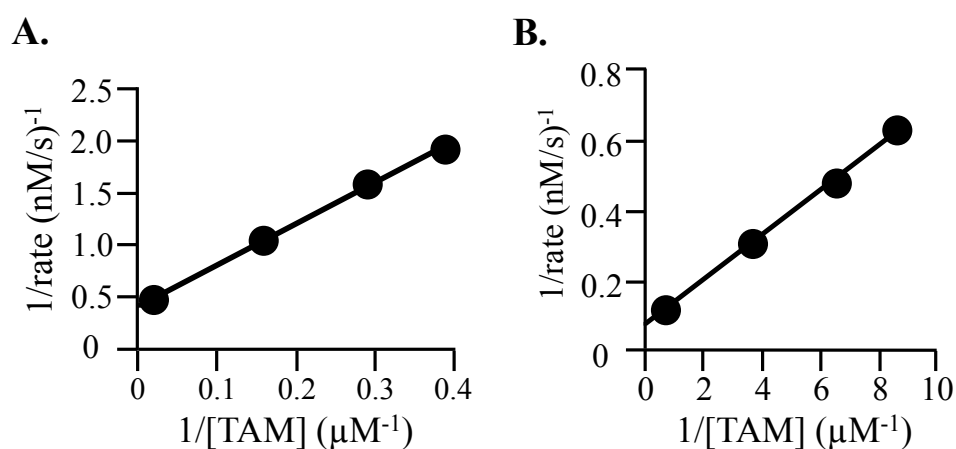

**Figure S2. TAM initial-rate studies. A.)** The turnover of  $E\bullet PAPS$ . The reaction conditions were SULT1A1 (3.0 nM, dimer),  $^{35}\text{S}$ -PAPS (3.5  $\mu\text{M}$ ),  $\text{MgCl}_2$  (5.0 mM), and  $\text{NaPO}_4$  (50 mM), pH 7.2,  $T = 25 \pm 2$  °C. **B.)** The turnover of  $E\bullet(PAPS)_2$ . Conditions were identical to A except that  $[\text{PAPS}] = 300$   $\mu\text{M}$ . Radiolabelled reactants were separated using reverse phase TLC and quantitated using storm imaging. Each point is the average of three independent determinations.  $K_m$  and  $k_{\text{cat}}$  values are compiled in Table 3. Further details are given in *Materials and Methods*.

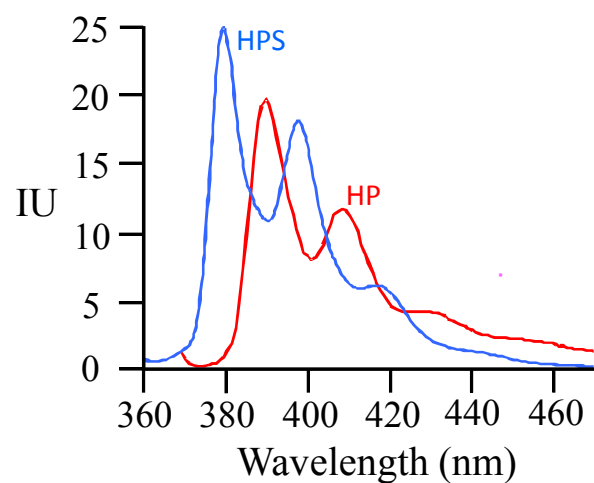

**Figure S3. Fluorescence spectra of 1-HP & 1-HPS.** Emission spectra of 1-HP (1-hydroxypyrene) and 1-HPS (1-hydroxypyrene sulfate) at  $\lambda_{\text{ex}} = 320$  nm. Solutions contained 1-HP (1.0  $\mu\text{M}$ ) or 1-HPS (1.0  $\mu\text{M}$ ),  $\text{MgCl}_2$  (5.0 mM),  $\text{NaPO}_4$  (50 mM), pH 7.2,  $T = 25 \pm 1$  °C.

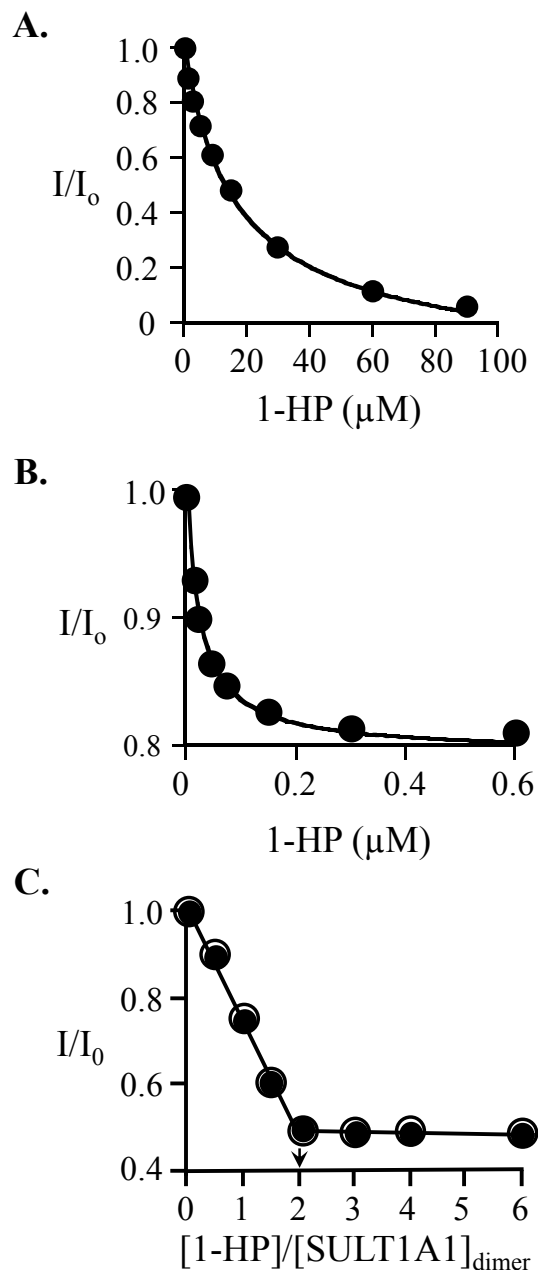

**Figure S4. I-HP binding to the E and E·(PAP)<sub>2</sub> forms of SULT1A1.** **A.)** I-HP binding to E. Ligand binding was monitored *via* changes in SULT1A1 intrinsic fluorescence ( $\lambda_{\text{ex}} = 280 \text{ nm}$ ,  $\lambda_{\text{em}} = 335 \text{ nm}$ ). The conditions were as follows: SULT1A1 (8.0  $\mu\text{M}$ , dimer), MgCl<sub>2</sub> (5.0 mM), NaPO<sub>4</sub> (50 mM), pH 7.2, T = 25  $\pm$  2°C. Each point is the average of three independent determinations. The line through the points is the behavior predicted by a best-fit of the data assuming a single binding site *per* subunit. **B.)** I-HP binding to E·(PAP)<sub>2</sub>. The conditions were identical to A except SULT1A1 = 50nM (dimer) and [PAP] = 2.0  $\mu\text{M}$ . **C.)** The stoichiometry of I-HP binding to E and E·(PAP)<sub>2</sub>. Conditions were identical to A except that [SULT1A1] = 120  $\mu\text{M}$  (dimer,  $\circ$ ), or [SULT1A1] = 1.0  $\mu\text{M}$  (dimer), [PAP] = 1.5  $\mu\text{M}$  ( $\bullet$ ). I-HP binds to E and E·(PAP)<sub>2</sub> with a stoichiometry of 1.0 *per* subunit.
